# Supplementary material
Source: PubMed Central journal article supplement (PMC8218584)
Supplement: i1537-2073-23-3-114_s01.pdf [file i1537-2073-23-3-114_s01.pdf]

**Table S1. Demographics and contributing factors in patients who would prefer infusible therapies at home** (Adjusted OR for sex and infusion type)

|                                             | N  | Would consider home treatment, No. (%) | Unadjusted analysis |         | Adjusted analysis |         |
|---------------------------------------------|----|----------------------------------------|---------------------|---------|-------------------|---------|
|                                             |    |                                        | OR (95% CI)         | P value | OR (95% CI)       | P value |
| Male                                        | 21 | 11 (52%)                               |                     |         |                   |         |
| Female                                      | 62 | 39 (63%)                               | 1.54 (0.56-4.22)    | .44     | 1.54 (0.56-4.22)  | .42     |
| Treatment Ocrelizumab                       | 21 | 9 (43%)                                |                     |         |                   |         |
| Treatment Natalizumab                       | 55 | 34 (62%)                               | 1.21 (0.43-3.37)    | .79     | 1.38 (0.47-4.02)  | .56     |
| Not working or studying                     | 24 | 15 (63%)                               |                     |         |                   |         |
| Working or studying                         | 59 | 35 (59%)                               | 0.88 (0.32-2.30)    | 1.00    | 0.98(0.34-2.72)   | .97     |
| ≤20 km from hospital                        | 46 | 26 (57%)                               |                     |         |                   |         |
| >20 km from hospital                        | 36 | 24 (67%)                               | 1.54 (0.63-3.87)    | .37     | 1.67 (0.66-4.33)  | .28     |
| Cannot walk 100 m                           | 10 | 7 (70%)                                |                     |         |                   |         |
| Can walk 100 m                              | 72 | 42 (58%)                               | 0.60 (0.12-2.35)    | .73     | 0.70 (0.13-3.08)  | .65     |
| Do not require childcare to attend infusion | 72 | 42 (58%)                               |                     |         |                   |         |
| Require childcare to attend infusion        | 11 | 8 (73%)                                | 1.90 (0.50-9.24)    | .73     | 1.72 (0.45-8.48)  | .45     |
| ≤30 y                                       | 16 | 12 (75%)                               |                     |         |                   |         |
| >30 y                                       | 65 | 36 (55%)                               | 0.41 (0.11-1.33)    |         | 0.42 (0.11-1.37)  | .17     |
| ≤42 y <sup>a</sup>                          | 42 | 25 (60%)                               |                     |         |                   |         |
| >42 y <sup>a</sup>                          | 39 | 23 (59%)                               | 0.98 (0.40-2.38)    |         | 1.01 (0.41-2.52)  | .98     |

Note: Age was not recorded for two patients. Distance from hospital was not recorded for one patient. Disability was not recorded for one patient. Treatment other than Ocrelizumab and Natalizumab seven patients.

Abbreviation: OR, odds ratio.

<sup>a</sup>42 is the mean age in this dataset

## **Appendix S1. Quality Assurance Survey of Ambulatory Neuroimmunology Patient Preferences' on Outpatient Infusion Therapy Services**

### **DEMOGRAPHICS**

What postcode do you currently live in? \_\_\_\_\_

How old are you? \_\_\_\_\_

Gender:

- Male
- Female
- Unspecified/Other

Are you currently employed:

- Full time
- Part time
- Not applicable

Are you full-time student?

- Yes
- No

Do you take time off from work or school to attend your infusion?

- Yes
- No
- Not applicable

Do you require childcare to allow you to attend your infusion?

- Yes
- No

Can you walk unaided more than 100 meters?

- Yes
- No

How did you travel to the infusion center today?

- Car (You drove)
- Ride from family or friend
- Public Transport
- Taxi/Uber
- Walk/Bike

## INFUSION INFORMATION:

How would you rate the current accessibility to infusion therapy at Alfred Health?

- Excellent, non-restrictive
- Good, but somewhat restrictive
- Fair, but restrictive
- Poor, extremely restrictive

What infusion are you currently receiving?

- Ocrelizumab (Ocrevus)
- Alemtuzumab (Lemtrada)
- Natalizumab (Tysabri)
- Rituximab (Mabthera)
- Methylprednisolone
- Other: \_\_\_\_\_

### Infusion preferences:

If you had a choice, what times would you like to start receiving your infusion? (Please select one)

- Before 8am (if infusion allows)
- 8-10am
- 10-12am
- 12-2pm
- 2pm-4pm
- 4pm -6pm
- 6pm-8pm

If you had a choice, where would your preference be to receive your infusion? (Please select one)

- The Alfred Hospital (55 Commercial Road Melbourne 3004)
- Sandringham Hospital (193 Bluff Rd, Sandringham 3191)
- Caulfield Hospital (260 Kooyong Rd, Caulfield 3162)

If receiving an infusion in hospital, where would you prefer the infusion to take place? (Please select one)

- Medical Day Unit
- Main Inpatient Building
- No preference

Would you be interested in receiving your infusion at home?

- Yes
- No

Comment:

What could the current Infusion Medical Day unit infusion service do to improve the care it provides to better meet the needs of its patients?

|  |
|--|
|  |
|  |
|  |
|  |

Thank you for your participation.

## **Appendix S2. Domains**

|                              |
|------------------------------|
| Age/sex                      |
| Distance to service          |
| Infusion type                |
| Disability                   |
| Employment/study commitments |
| Childcare requirements       |
| Transport                    |
| Infusion location preference |
